# Supplementary material
Source: PubMed Central journal article supplement (PMC1458864)
Supplement: pnas_0509950103_1.pdf [file pnas_0509950103_1.pdf]

|         |     | basic 1 | basic 2 | helix | helix |     |
|---------|-----|---------|---------|-------|-------|-----|
| GgAHR   | 1   | M       | -       | -     | -     | 68  |
| ShAHR   | 1   | M       | -       | -     | -     | 68  |
| MmAHR   | 1   | M       | S       | G     | A     | 70  |
| basic 1 |     |         |         |       |       |     |
| GgAHR   | 69  | L       | S       | V     | S     | 137 |
| ShAHR   | 69  | L       | S       | V     | S     | 138 |
| MmAHR   | 71  | L       | S       | V     | T     | 136 |
| PAS-A   |     |         |         |       |       |     |
| GgAHR   | 138 | S       | S       | T     | I     | 207 |
| ShAHR   | 139 | S       | S       | T     | I     | 208 |
| MmAHR   | 137 | S       | S       | T     | I     | 202 |
| PAS-B   |     |         |         |       |       |     |
| GgAHR   | 208 | P       | P       | E     | N     | 277 |
| ShAHR   | 209 | P       | P       | E     | N     | 278 |
| MmAHR   | 203 | P       | P       | E     | N     | 272 |
| PAS-B   |     |         |         |       |       |     |
| GgAHR   | 278 | E       | I       | R     | T     | 347 |
| ShAHR   | 279 | E       | I       | R     | T     | 348 |
| MmAHR   | 273 | E       | I       | R     | T     | 342 |
| PAC     |     |         |         |       |       |     |
| GgAHR   | 348 | T       | V       | F     | R     | 417 |
| ShAHR   | 349 | T       | V       | F     | R     | 418 |
| MmAHR   | 343 | T       | V       | F     | R     | 412 |
| GgAHR   | 418 | P       | M       | S     | S     | 484 |
| ShAHR   | 419 | P       | M       | S     | S     | 485 |
| MmAHR   | 413 | P       | M       | S     | S     | 479 |
| GgAHR   | 485 | D       | E       | L     | S     | 554 |
| ShAHR   | 486 | D       | E       | L     | S     | 555 |
| MmAHR   | 480 | -       | -       | -     | -     | 546 |
| GgAHR   | 555 | C       | I       | Q     | Q     | 622 |
| ShAHR   | 556 | C       | I       | Q     | Q     | 623 |
| MmAHR   | 547 | S       | M       | Q     | -     | 614 |
| GgAHR   | 623 | I       | H       | Q     | H     | 683 |
| ShAHR   | 624 | L       | H       | Q     | H     | 685 |
| MmAHR   | 615 | Q       | Q       | L     | Q     | 684 |
| GgAHR   | 684 | A       | E       | F     | S     | 753 |
| ShAHR   | 686 | P       | E       | F     | -     | 754 |
| MmAHR   | 685 | Q       | E       | F     | -     | 748 |
| GgAHR   | 754 | L       | D       | C     | G     | 823 |
| ShAHR   | 755 | H       | E       | C     | G     | 824 |
| MmAHR   | 749 | Q       | S       | H     | G     | 805 |
| GgAHR   | 824 | Q       | L       | D     | V     | 858 |
| ShAHR   | 825 | Q       | L       | D     | V     | 859 |
| MmAHR   | 806 |         |         |       |       | 805 |
