# Supplementary material
Source: PubMed Central journal article supplement (PMC1458864)
Supplement: pnas_0509950103_4.pdf [file pnas_0509950103_4.pdf]

# A

|            |   |   |   |   |   |   |   |   |   |   |   |   |   |   |   |   |   |   |   |   |   |   |   |   |   |   |   |   |   |   |   |   |   |   |   |   |   |   |   |   |   |   |   |   |   |   |   |   |   |    |    |    |
|------------|---|---|---|---|---|---|---|---|---|---|---|---|---|---|---|---|---|---|---|---|---|---|---|---|---|---|---|---|---|---|---|---|---|---|---|---|---|---|---|---|---|---|---|---|---|---|---|---|---|----|----|----|
| GgAHR_LBD  | 1 | A | M | N | F | Q | G | R | L | K | F | L | H | G | Q | N | K | K | G | K | D | G | - | A | L | S | P | Q | L | A | L | F | A | V | A | T | P | L | Q | P | P | S | I | L | E | I | R | T | K | N  | 49 |    |
| ShAHR_LBD  | 1 | A | M | N | F | Q | G | R | L | K | F | L | H | G | Q | N | K | K | G | K | D | G | - | A | T | L | S | P | Q | L | A | L | F | A | V | A | T | P | L | Q | P | P | S | I | L | E | I | R | T | K  | N  | 49 |
| HsAHR_LBD  | 1 | A | M | N | F | Q | G | R | L | K | F | L | H | G | Q | N | K | K | G | K | D | G | - | S | L | L | P | P | Q | L | A | L | F | A | I | A | T | P | L | Q | P | P | S | I | L | E | I | R | T | K  | N  | 49 |
| MmAHR_LBD  | 1 | A | M | N | F | Q | G | R | L | K | Y | L | H | G | Q | N | K | K | G | K | D | G | - | A | L | L | P | P | Q | L | A | L | F | A | I | A | T | P | L | Q | P | P | S | I | L | E | I | R | T | K  | N  | 49 |
| FhAHR1_LBD | 1 | A | L | N | I | Q | G | R | L | K | F | L | H | G | Q | N | Q | Q | R | E | N | G | - | G | K | A | T | P | Q | L | A | L | F | A | I | A | T | P | L | Q | P | P | S | I | L | E | I | R | T | K  | N  | 49 |
| FhAHR2_LBD | 1 | A | L | K | F | H | G | R | L | K | Y | L | Q | G | Q | N | L | C | K | D | I | E | - | T | C | K | K | V | Q | L | A | L | F | A | I | A | M | P | V | Q | P | P | S | I | V | E | I | R | A | K  | M  | 49 |
| DmAHR_LBD  | 1 | R | L | D | I | R | G | R | I | K | V | L | H | G | Q | N | R | K | T | E | - | - | - | - | E | P | P | L | A | L | F | A | Y | C | T | P | F | G | P | P | S | L | L | E | I | P | H | K | E | 44 |    |    |
| CeAHR_LBD  | 1 | R | I | D | M | R | G | K | L | M | S | L | H | G | L | P | S | S | Y | V | M | G | R | T | A | S | G | P | V | L | G | M | I | C | V | C | T | P | F | V | P | P | S | T | S | D | L | A | S | E  | D  | 50 |

|            |    |   |   |   |   |   |   |   |   |   |   |   |   |   |   |   |   |   |   |   |   |   |   |   |   |   |   |   |   |   |   |   |   |   |   |   |   |   |   |   |   |   |   |   |   |   |   |   |   |   |   |    |    |
|------------|----|---|---|---|---|---|---|---|---|---|---|---|---|---|---|---|---|---|---|---|---|---|---|---|---|---|---|---|---|---|---|---|---|---|---|---|---|---|---|---|---|---|---|---|---|---|---|---|---|---|---|----|----|
| GgAHR_LBD  | 50 | F | I | F | R | T | K | H | K | L | D | F | T | P | T | G | C | D | A | K | G | K | I | V | L | G | Y | T | E | A | E | L | C | M | R | G | T | G | Y | Q | F | I | H | A | A | D | M | L | Y | C | A | 99 |    |
| ShAHR_LBD  | 50 | F | I | F | R | T | K | H | K | L | D | F | T | P | T | G | C | D | A | K | G | K | I | V | L | G | Y | T | E | A | E | L | C | M | R | G | T | G | Y | Q | F | V | H | A | A | D | M | L | Y | C | A | 99 |    |
| HsAHR_LBD  | 50 | F | I | F | R | T | K | H | K | L | D | F | T | P | I | G | C | D | A | K | G | R | I | V | L | G | Y | T | E | A | E | L | C | T | R | G | S | G | Y | Q | F | I | H | A | A | D | M | L | Y | C | A | 99 |    |
| MmAHR_LBD  | 50 | F | I | F | R | T | K | H | K | L | D | F | T | P | I | G | C | D | A | K | G | Q | L | I | V | L | G | Y | T | E | V | E | L | C | T | R | G | S | G | Y | Q | F | I | H | A | A | D | I | L | H | C | A  | 99 |
| FhAHR1_LBD | 50 | M | I | F | R | T | K | H | K | L | D | F | T | P | L | A | C | D | A | K | G | K | I | V | L | G | Y | T | E | A | E | L | R | V | R | G | S | G | Y | Q | F | I | H | A | A | D | M | L | Y | C | A | 99 |    |
| FhAHR2_LBD | 50 | L | L | F | Q | T | R | H | K | L | D | F | T | P | T | G | V | D | T | R | G | K | A | I | V | L | G | Y | T | E | I | E | L | C | M | K | G | S | G | Y | Q | F | I | H | A | A | D | M | M | Y | C | A  | 99 |
| DmAHR_LBD  | 45 | N | M | F | K | S | K | H | K | L | D | F | S | L | V | S | M | D | Q | R | G | K | H | I | L | G | Y | A | D | A | E | L | V | N | M | G | - | G | Y | D | L | V | H | Y | D | D | L | A | Y | V | A | 93 |    |
| CeAHR_LBD  | 51 | M | I | L | K | T | K | H | Q | L | D | G | A | L | V | S | M | D | Q | K | V | Y | E | M | L | E | I | D | E | T | D | L | P | M | P | L | - | - | Y | N | L | V | H | V | E | D | A | V | C | M | A | 98 |    |

|            |     |   |   |   |   |   |   |   |   |   |   |   |   |   |   |   |   |   |   |   |   |   |   |   |   |   |   |   |   |   |   |   |   |   |   |   |   |   |   |   |   |   |   |   |   |   |   |   |   |   |     |     |
|------------|-----|---|---|---|---|---|---|---|---|---|---|---|---|---|---|---|---|---|---|---|---|---|---|---|---|---|---|---|---|---|---|---|---|---|---|---|---|---|---|---|---|---|---|---|---|---|---|---|---|---|-----|-----|
| GgAHR_LBD  | 100 | E | N | H | V | R | M | M | K | T | G | E | S | G | M | T | V | F | R | L | L | - | T | K | E | N | R | W | A | W | V | Q | A | N | A | R | L | V | Y | K | N | G | R | P | D | Y | I | I | S | T | Q   | 148 |
| ShAHR_LBD  | 100 | E | N | H | V | R | M | M | K | T | G | E | S | G | M | T | V | F | R | L | L | - | T | K | E | N | R | W | A | W | V | Q | A | N | A | R | L | V | Y | K | N | G | R | P | D | Y | I | I | A | T | Q   | 148 |
| HsAHR_LBD  | 100 | E | S | H | I | R | M | I | K | T | G | E | S | G | M | I | V | F | R | L | L | - | T | K | N | N | R | W | T | W | V | Q | S | N | A | R | L | V | Y | K | N | G | R | P | D | Y | I | I | V | T | Q   | 148 |
| MmAHR_LBD  | 100 | E | S | H | I | R | M | I | K | T | G | E | S | G | M | T | V | F | R | L | L | - | A | K | H | S | R | W | R | W | V | Q | S | N | A | R | L | V | Y | R | N | G | R | P | D | Y | I | I | A | T | Q   | 148 |
| FhAHR1_LBD | 100 | E | N | H | V | R | M | I | K | T | G | E | S | G | L | T | V | F | R | L | L | - | T | K | E | N | R | W | K | W | V | Q | A | N | A | R | L | V | Y | K | N | G | K | P | D | Y | I | I | A | T | Q   | 148 |
| FhAHR2_LBD | 100 | D | N | H | I | R | M | I | K | T | G | E | S | G | L | T | V | F | R | L | L | - | S | K | S | N | G | W | V | W | V | K | S | N | A | K | L | I | Y | K | E | E | R | P | E | F | I | I | A | F | Q   | 148 |
| DmAHR_LBD  | 94  | S | A | H | Q | E | L | L | K | T | G | A | S | G | M | I | A | Y | R | Y | Q | - | K | K | D | G | E | W | Q | W | L | Q | T | S | S | R | L | V | Y | K | N | S | K | P | D | F | V | I | C | T | H   | 142 |
| CeAHR_LBD  | 99  | E | A | H | K | E | A | I | K | N | G | S | G | L | L | V | Y | R | L | V | S | T | K | T | R | R | T | Y | F | V | Q | S | S | C | R | M | F | Y | K | N | S | K | P | E | S | I | G | L | T | H | 148 |     |

|            |     |   |   |   |   |   |   |   |   |   |   |   |   |   |   |   |   |   |   |   |   |     |
|------------|-----|---|---|---|---|---|---|---|---|---|---|---|---|---|---|---|---|---|---|---|---|-----|
| GgAHR_LBD  | 149 | R | P | L | T | D | E | E | G | A | E | H | L | R | K | R | N | M | K | L | P | 168 |
| ShAHR_LBD  | 149 | R | P | L | T | D | E | E | G | A | E | H | L | R | K | R | N | M | K | L | P | 168 |
| HsAHR_LBD  | 149 | R | P | L | T | D | E | E | G | T | E | H | L | R | K | R | N | T | K | L | P | 168 |
| MmAHR_LBD  | 149 | R | P | L | T | D | E | E | G | R | E | H | L | Q | K | R | S | T | S | L | P | 168 |
| FhAHR1_LBD | 149 | R | P | L | L | D | E | E | G | G | E | H | L | R | K | R | S | M | H | L | P | 168 |
| FhAHR2_LBD | 149 | K | A | L | T | N | A | E | G | E | E | Y | L | R | Q | R | R | L | Q | L | P | 168 |
| DmAHR_LBD  | 143 | R | Q | L | M | D | E | E | G | H | D | L | L | G | K | R | T | M | D | F | K | 162 |
| CeAHR_LBD  | 149 | R | L | L | N | E | V | E | G | T | M | L | L | E | K | R | - | S | T | L | K | 167 |

# B

|             |   |   |   |   |   |   |   |   |   |   |   |   |   |   |   |   |   |   |   |   |   |   |   |   |   |   |   |   |   |   |   |   |   |   |   |   |   |   |   |   |   |   |   |   |   |   |   |   |   |   |   |    |
|-------------|---|---|---|---|---|---|---|---|---|---|---|---|---|---|---|---|---|---|---|---|---|---|---|---|---|---|---|---|---|---|---|---|---|---|---|---|---|---|---|---|---|---|---|---|---|---|---|---|---|---|---|----|
| Gg_AHR1_LBD | 1 | A | M | N | F | Q | G | R | L | K | F | L | H | G | Q | N | K | K | G | K | D | G | A | A | L | S | P | Q | L | A | L | F | A | V | A | T | P | L | Q | P | P | S | I | L | E | I | R | T | K | N | F | 50 |
| Sh_AHR1_LBD | 1 | A | M | N | F | Q | G | R | L | K | F | L | H | G | Q | N | K | K | G | K | D | G | A | T | L | S | P | Q | L | A | L | F | A | V | A | T | P | L | Q | P | P | S | I | L | E | I | R | T | K | N | F | 50 |
| La_AHR1_LBD | 1 | A | M | N | F | Q | G | R | L | K | F | L | H | G | Q | N | K | K | G | K | D | G | A | T | L | S | P | Q | L | A | L | F | A | V | A | T | P | L | Q | P | P | S | I | L | E | I | R | T | K | N | F | 50 |
| Pc_AHR1_LBD | 1 | A | M | N | F | Q | G | R | L | K | F | L | H | G | Q | N | K | K | G | K | D | G | A | T | L | S | P | Q | L | A | L | F | A | V | A | T | P | L | Q | P | P | S | I | L | E | I | R | T | K | N | F | 50 |
| Dn_AHR1_LBD | 1 | A | M | N | F | Q | G | R | L | K | F | L | H | G | Q | N | K | K | G | K | D | G | A | T | L | S | P | Q | L | A | L | F | A | V | A | T | P | L | Q | P | P | S | I | L | E | I | R | T | K | N | F | 50 |
| Ap_AHR1_LBD | 1 | A | M | N | F | Q | G | R | L | K | F | L | H | G | Q | N | K | K | G | K | D | G | T | T | L | S | P | Q | L | A | L | F | A | V | A | T | P | L | Q | P | P | S | I | L | E | I | R | T | K | N | F | 50 |

|             |    |   |   |   |   |   |   |   |   |   |   |   |   |   |   |   |   |   |   |   |   |   |   |   |   |   |   |   |   |   |   |   |   |   |   |   |   |   |   |   |   |   |   |   |   |   |   |   |   |   |   |     |
|-------------|----|---|---|---|---|---|---|---|---|---|---|---|---|---|---|---|---|---|---|---|---|---|---|---|---|---|---|---|---|---|---|---|---|---|---|---|---|---|---|---|---|---|---|---|---|---|---|---|---|---|---|-----|
| Gg_AHR1_LBD | 51 | I | F | R | T | K | H | K | L | D | F | T | P | T | G | C | D | A | K | G | K | I | V | L | G | Y | T | E | A | E | L | C | M | R | G | T | G | Y | Q | F | I | H | A | A | D | M | L | Y | C | A | E | 100 |
| Sh_AHR1_LBD | 51 | I | F | R | T | K | H | K | L | D | F | T | P | T | G | C | D | A | K | G | K | I | V | L | G | Y | T | E | A | E | L | C | M | R | G | T | G | Y | Q | F | V | H | A | A | D | M | L | Y | C | A | E | 100 |
| La_AHR1_LBD | 51 | I | F | R | T | K | H | K | L | D | F | T | P | T | G | C | D | A | K | G | K | I | V | L | G | Y | T | E | A | E | L | C | M | R | G | T | G | Y | Q | F | V | H | A | A | D | M | L | Y | C | A | E | 100 |
| Pc_AHR1_LBD | 51 | I | F | R | T | K | H | K | L | D | F | T | P | T | G | C | D | A | K | G | K | I | V | L | G | Y | T | E | A | E | L | C | M | R | G | T | G | Y | Q | F | V | H | A | A | D | M | L | Y | C | A | E | 100 |
| Dn_AHR1_LBD | 51 | I | F | R | T | K | H | K | L | D | F | T | P | T | G | C | D | A | K | G | K | I | V | L | G | Y | T | E | A | E | L | C | M | R | G | T | G | Y | Q | F | V | H | A | A | D | M | L | Y | C | A | E | 100 |
| Ap_AHR1_LBD | 51 | I | F | R | T | K | H | K | L | D | F | T | P | T | G | C | D | A | K | G | K | I | V | L | G | Y | T | E | A | E | L | C | M | R | G | T | G | Y | Q | F | V | H | A | A | D | M | L | Y | C | A | E | 100 |

|             |     |   |   |   |   |   |   |   |   |   |   |   |   |   |   |   |   |   |   |   |   |   |   |   |   |   |   |   |   |   |   |   |   |   |   |   |   |   |   |   |   |   |   |   |   |   |   |   |   |   |   |     |
|-------------|-----|---|---|---|---|---|---|---|---|---|---|---|---|---|---|---|---|---|---|---|---|---|---|---|---|---|---|---|---|---|---|---|---|---|---|---|---|---|---|---|---|---|---|---|---|---|---|---|---|---|---|-----|
| Gg_AHR1_LBD | 101 | N | H | V | R | M | M | K | T | G | E | S | G | M | T | V | F | R | L | L | T | K | E | N | R | W | A | W | V | Q | A | N | A | R | L | V | Y | K | N | G | R | P | D | Y | I | I | S | T | Q | R | P | 150 |
| Sh_AHR1_LBD | 101 | N | H | V | R | M | M | K | T | G | E | S | G | M | T | V | F | R | L | L | T | K | E | N | R | W | A | W | V | Q | A | N | A | R | L | V | Y | K | N | G | R | P | D | Y | I | I | A | T | Q | R | P | 150 |
| La_AHR1_LBD | 101 | N | H | V | R | M | M | K | T | G | E | S | G | M | T | V | F | R | L | L | T | K | E | N | R | W | A | W | V | Q | A | N | A | R | L | V | Y | K | N | G | R | P | D | Y | I | I | A | T | Q | R | P | 150 |
