# Supplementary material
Source: PubMed Central journal article supplement (PMC1458864)

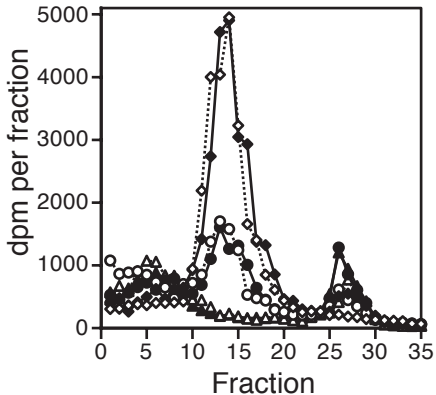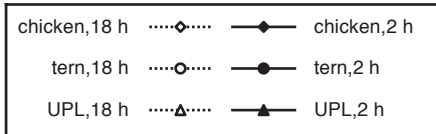

Supplement: pnas_0509950103_2.pdf [file pnas_0509950103_2.pdf]

chicken

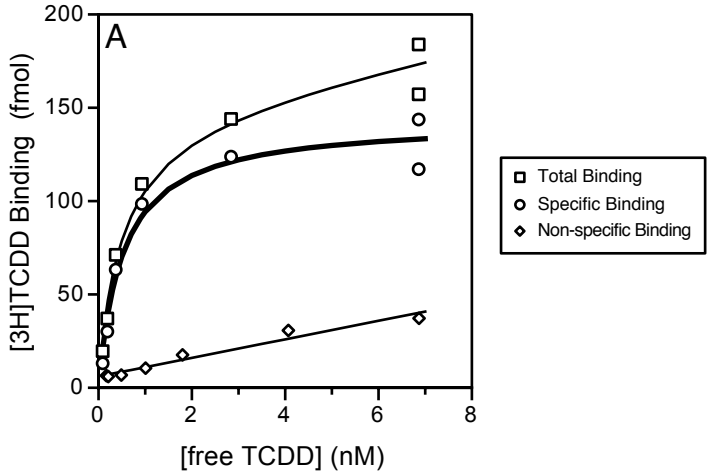

tern

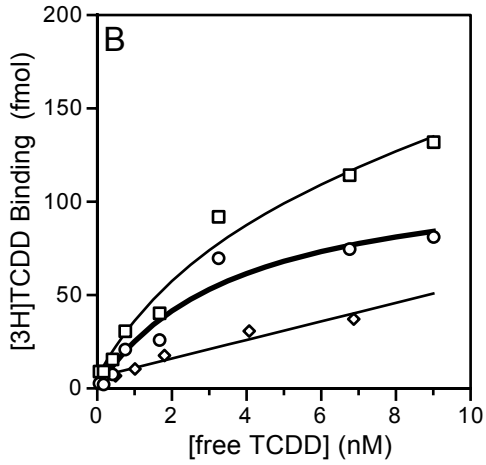

Supplement: pnas_0509950103_3.pdf [file pnas_0509950103_3.pdf]
